# Supplementary material for: Cervicovaginal microbiome and natural history of HPV in a longitudinal study
Source: PubMed Central journal article supplement (PMC7098574; doi:10.1371/journal.ppat.1008376), 2020-03-26

# A. Fungal Taxa Associated with HR-HPV Outcomes

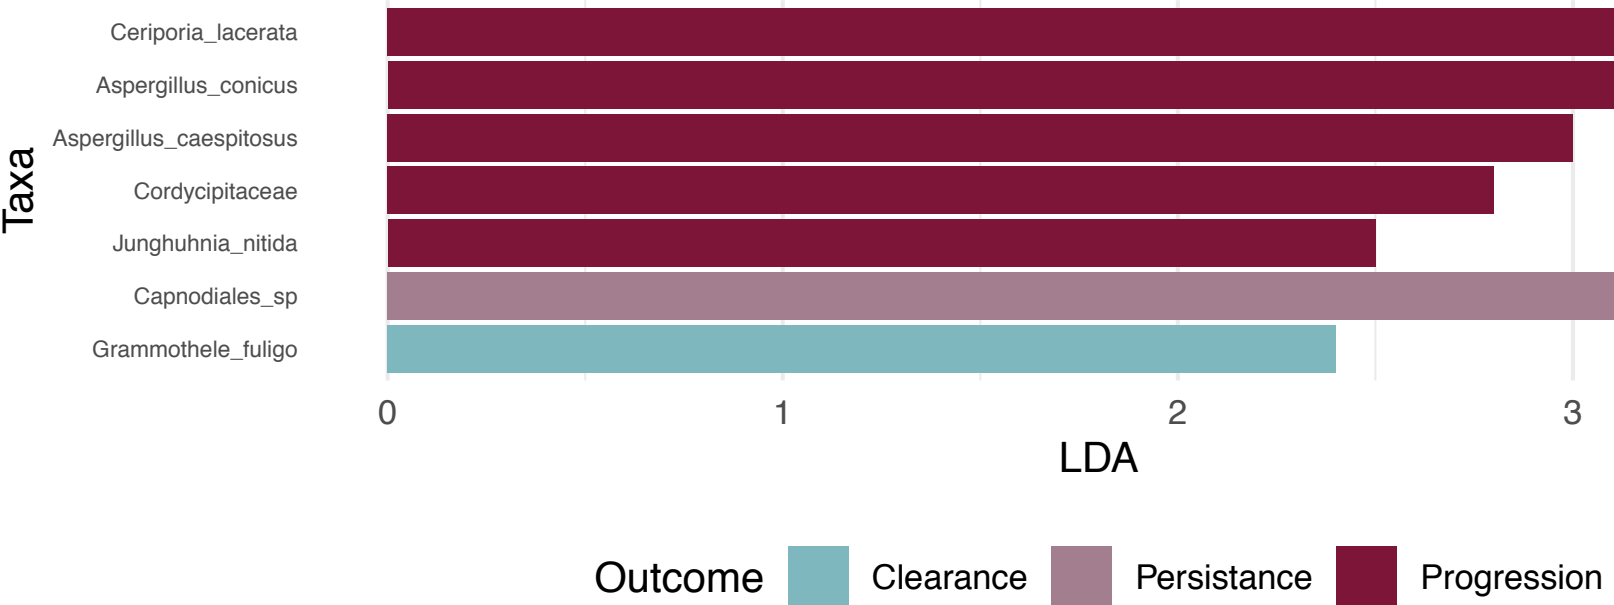

# B. Relative Abundance of Progression associated Taxa Across HR-HPV Outcomes

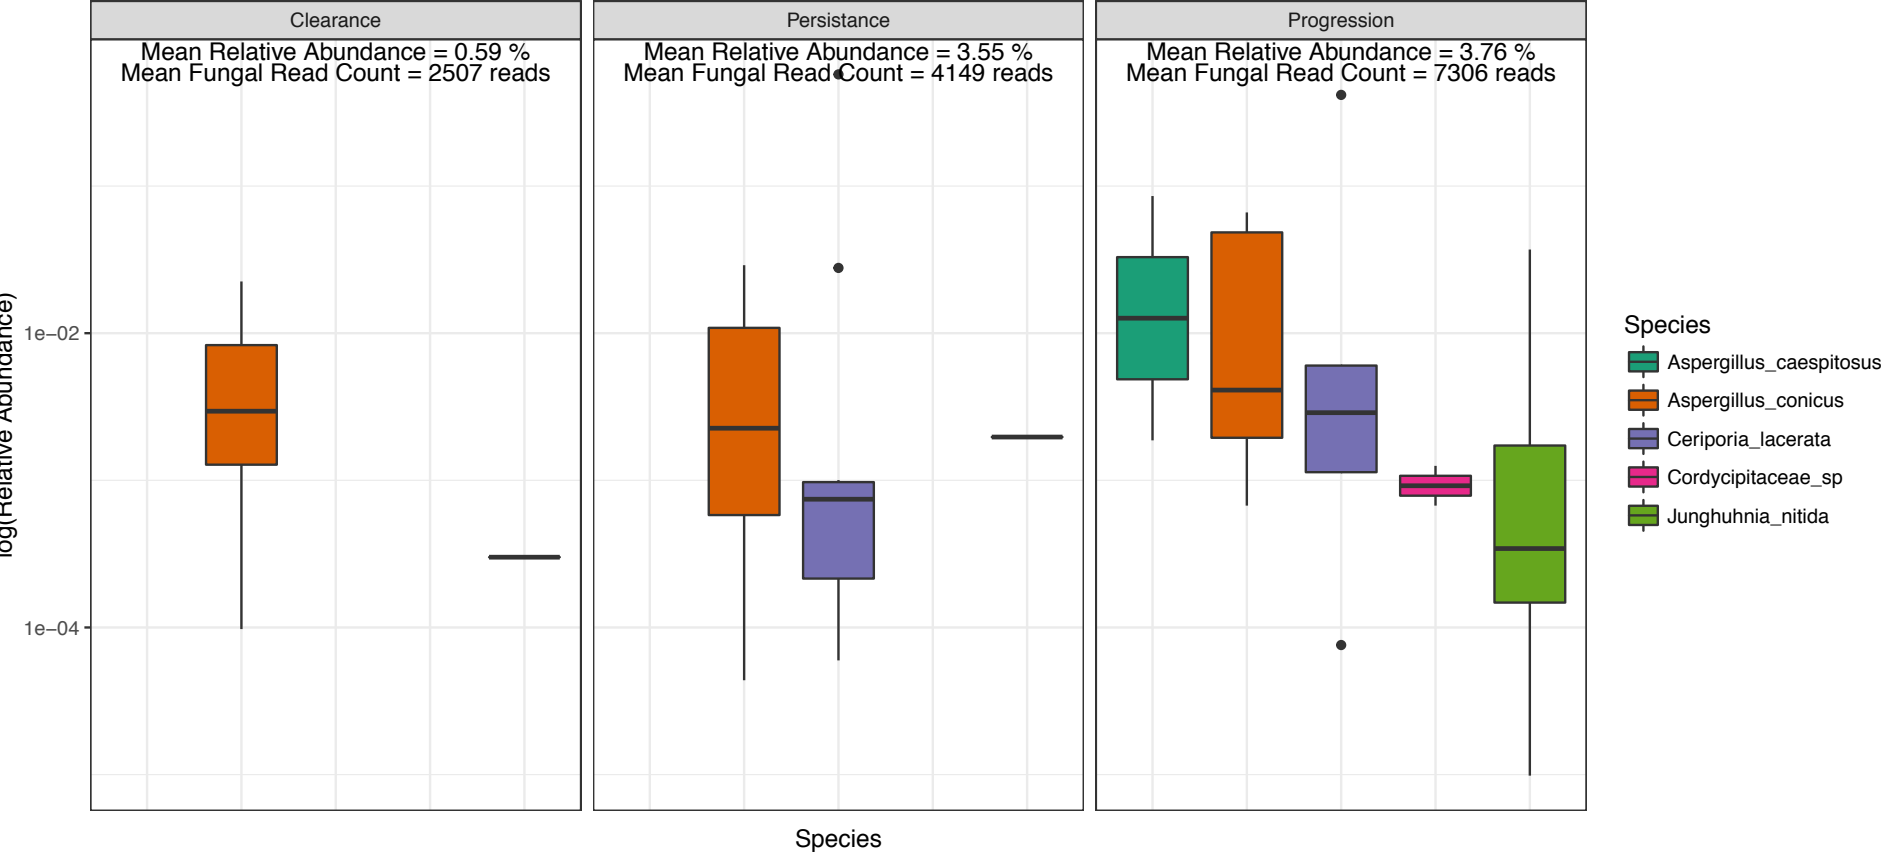

Supplement: ppat.1008376.s005.pdf [file ppat.1008376.s005.pdf]
