# Supplementary material for: Cervicovaginal microbiome and natural history of HPV in a longitudinal study
Source: PubMed Central journal article supplement (PMC7098574; doi:10.1371/journal.ppat.1008376), 2020-03-26

# Significant Pathway Predictor Correlation

Pearson correlation =  $-0.8$

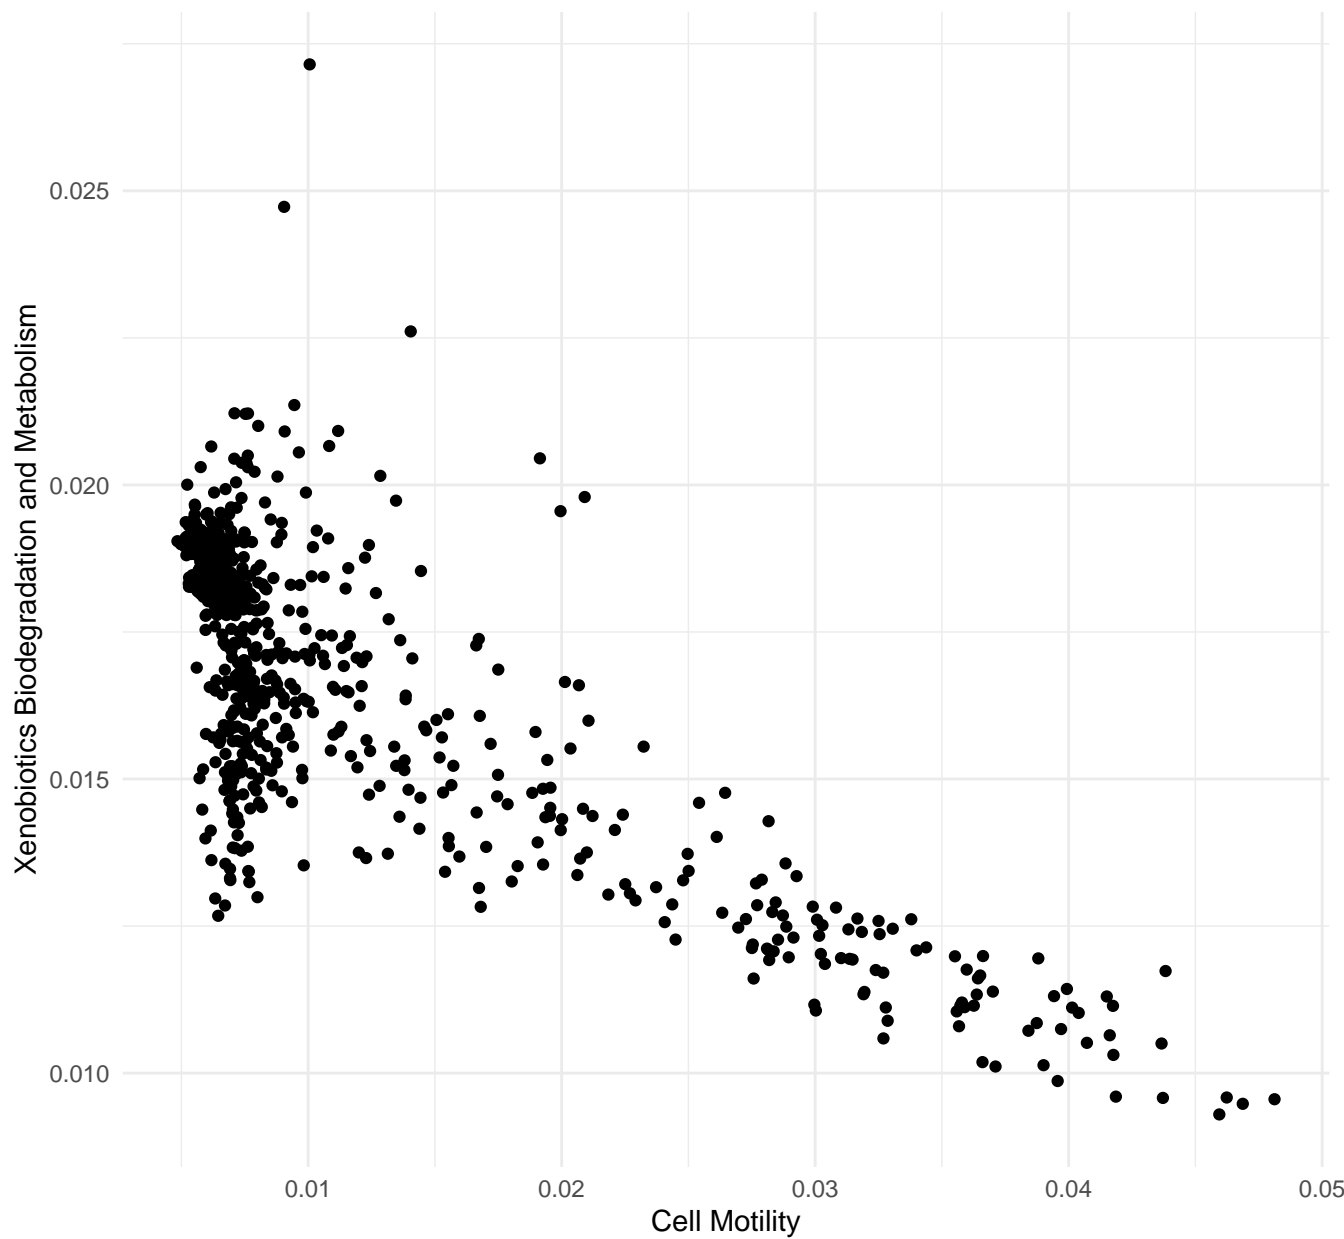

Supplement: ppat.1008376.s006.pdf [file ppat.1008376.s006.pdf]
